# Supplementary material for: Silica-supported boric acid assisted conversion of mono- and poly-saccharides to 5-hydroxymethylfurfural in ionic liquid
Source: Royal Society of Chemistry journal article supplement (doi:10.1039/c4ra01771d), 2014-01-01
Supplement: c4ra01771d1.pdf [file c4ra01771d1.pdf]

**Electronic Supplementary information**

**Silica-Supported Boric Acid Assisted Conversion of Mono- and Poly-saccharides to 5-Hydroxymethylfurfural in Ionic Liquid**

**Mayanka Walia, Upendra Sharma, Vijai K. Agnihotri,\*Bikram Singh\***

**Spectras and chromatograms of product HMF**

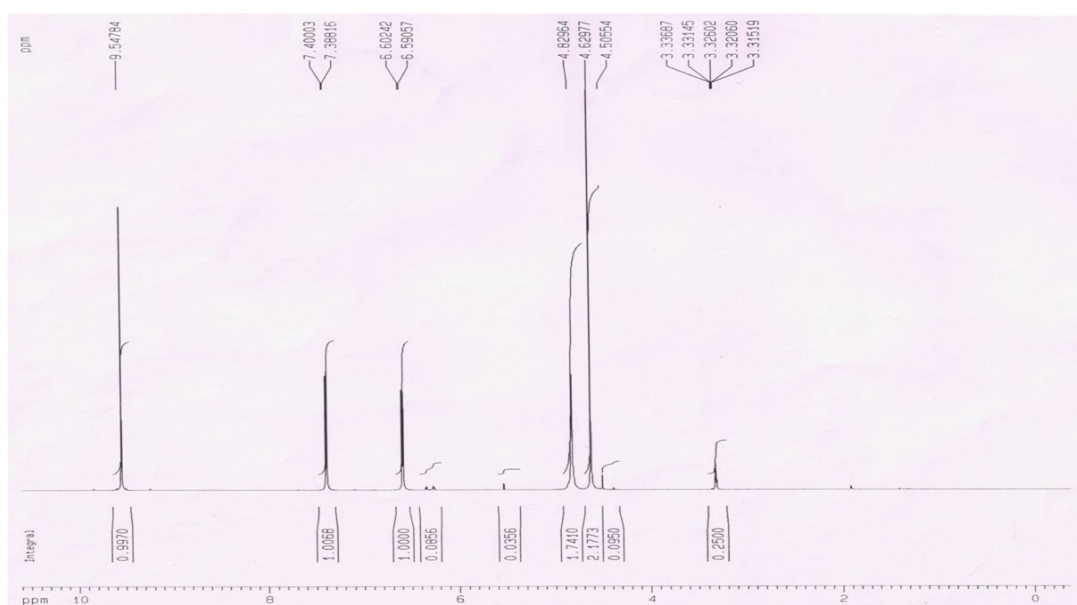

**Fig. S1**  $^1\text{H-NMR}$  spectra of isolated 5-HMF

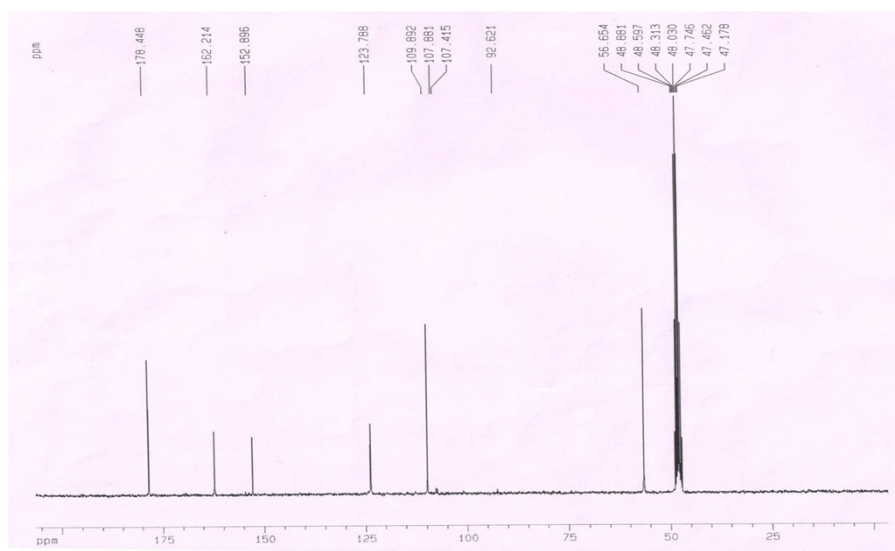

**Fig. S2**  $^{13}\text{C}$ -NMR spectra of isolated 5-HMF

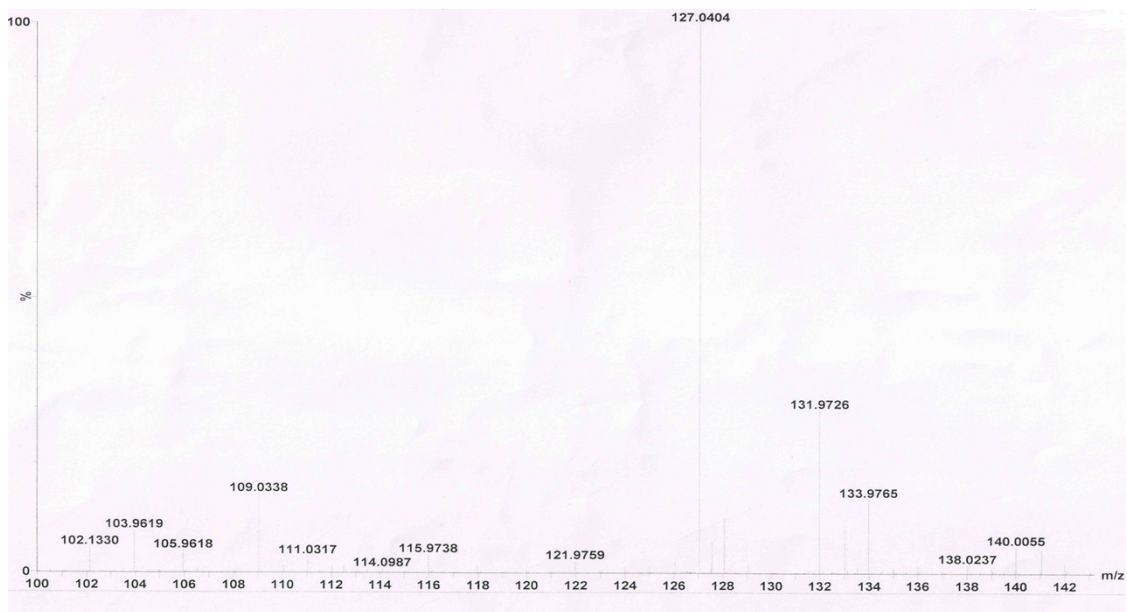

**Fig. S3** LC-HRMS chromatogram of isolated 5-HMF

**GC yield was calculated as**

$$\text{GC yield (\%)} = \frac{\text{ratio of product}}{\text{ratio of HMF standard}} \times 100$$

$$\text{where ratio of product} = \frac{\text{area of HMF product}}{\text{area of internal standard}}$$

$$\text{ratio of HMF standard} = \frac{\text{area of HMF standard}}{\text{area of internal standard}}$$

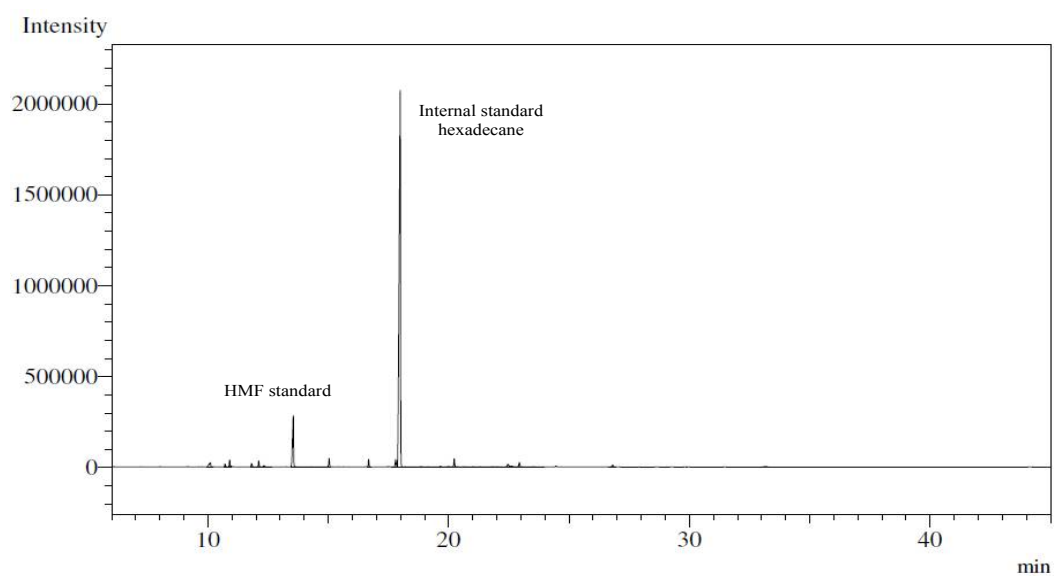

**Fig. S4** GC chromatogram of HMF standard

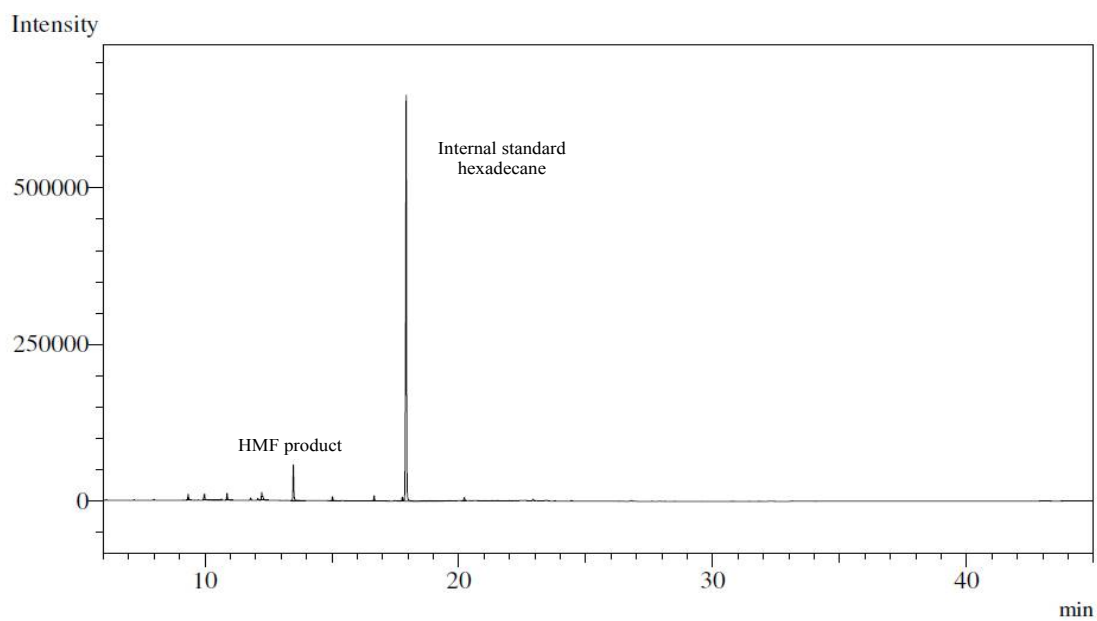

**Fig. S5** GC chromatogram of HMF obtained by conversion of fructose (without catalyst)

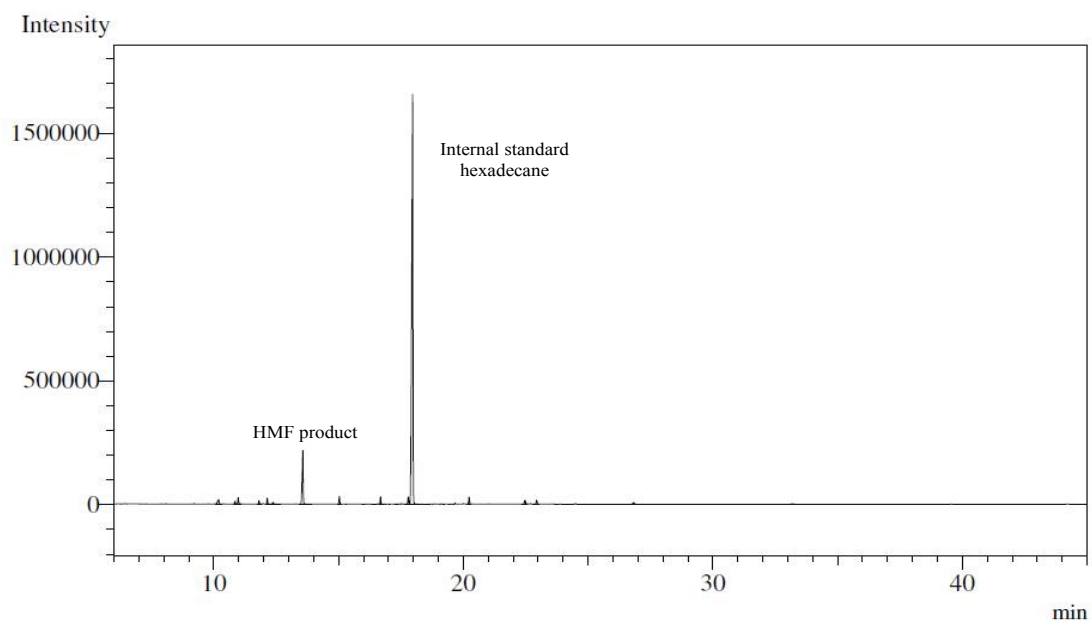

**Fig. S6** GC chromatogram of HMF obtained by conversion of fructose (using catalyst)

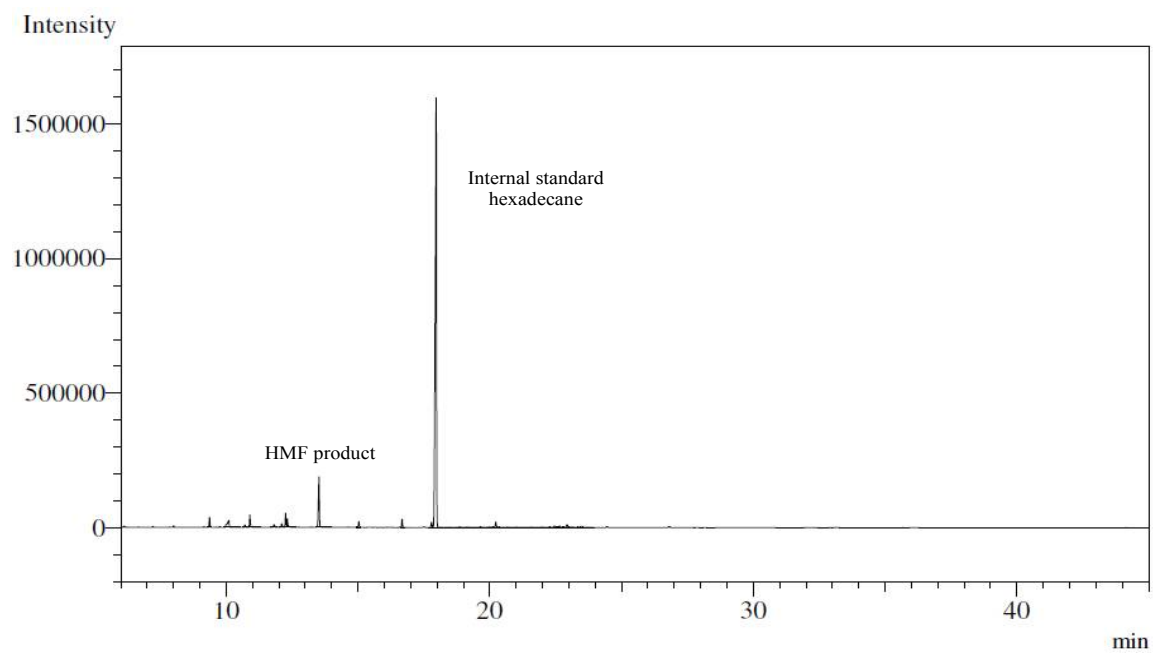

**Fig. S7** GC chromatogram of HMF obtained by conversion of sucrose (with catalyst)

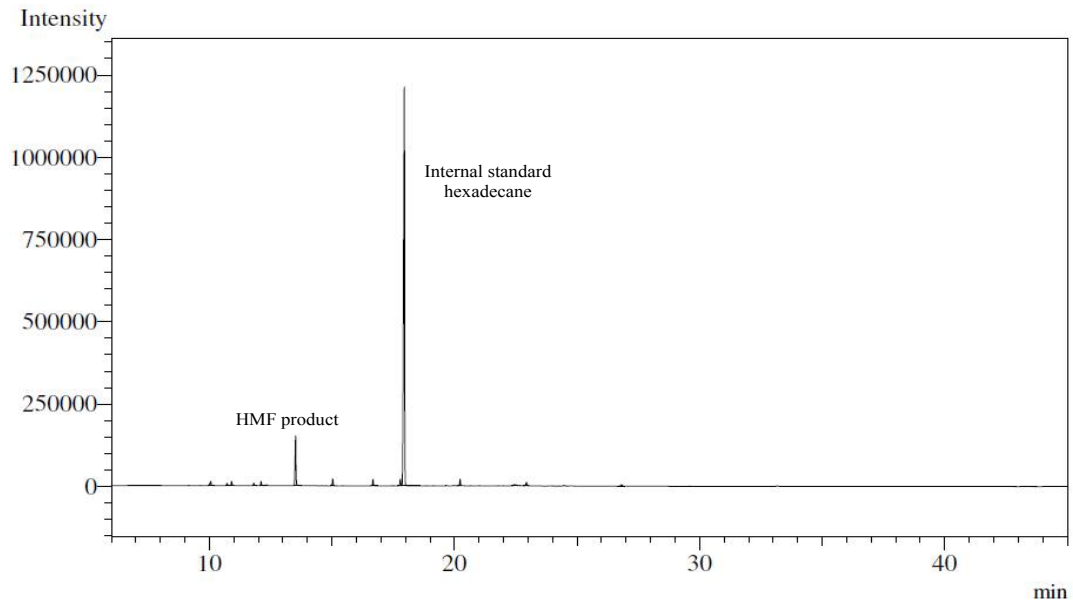

**Fig. S8** GC chromatogram of HMF obtained by conversion of inulin (with catalyst)

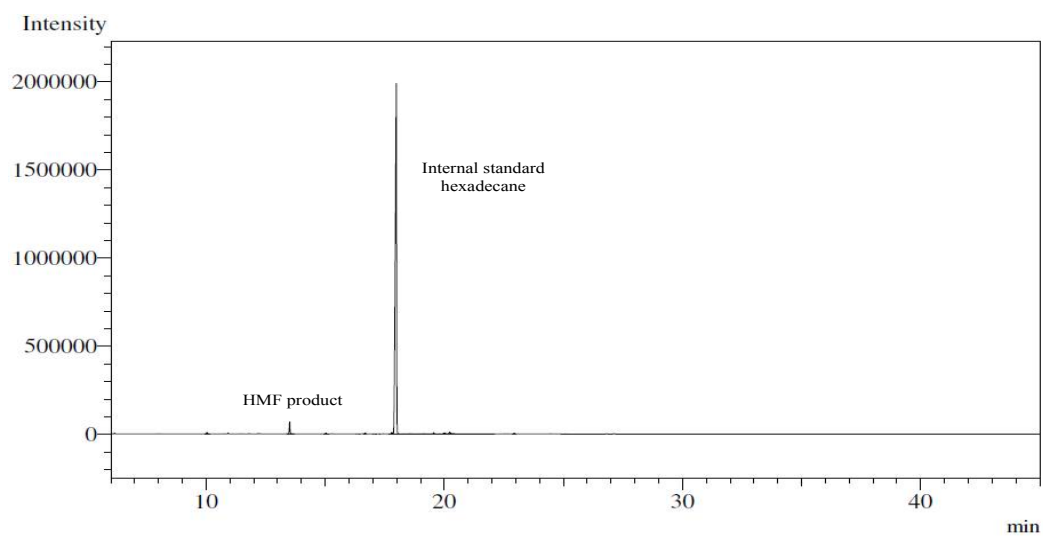

**Fig. S9** GC chromatogram of HMF obtained by conversion of cellulose (with catalyst)

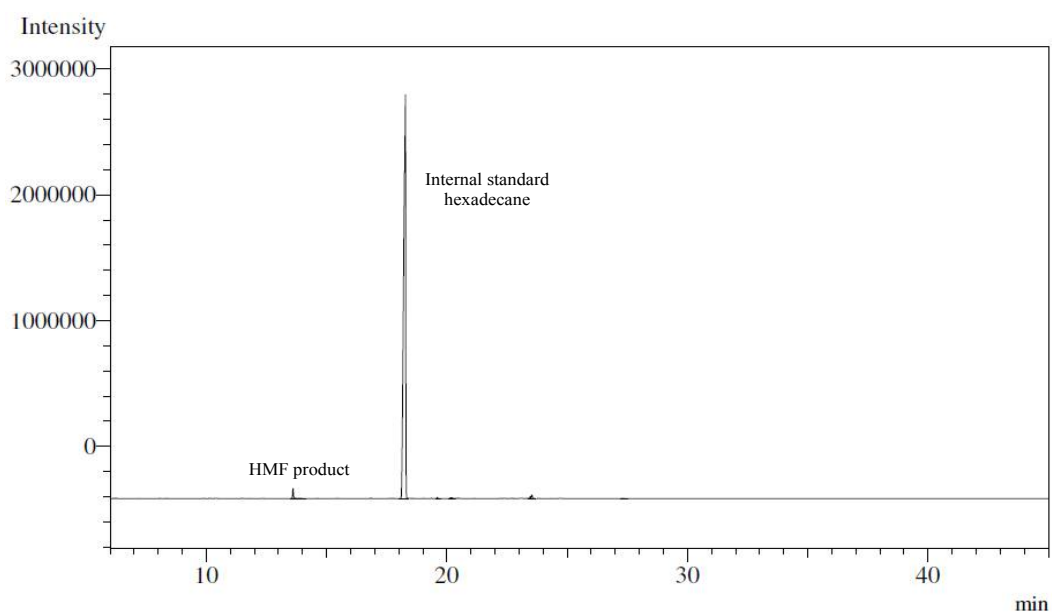

**Fig. S10** GC chromatogram of HMF obtained by conversion of glucose (with sodium borate as a catalyst)

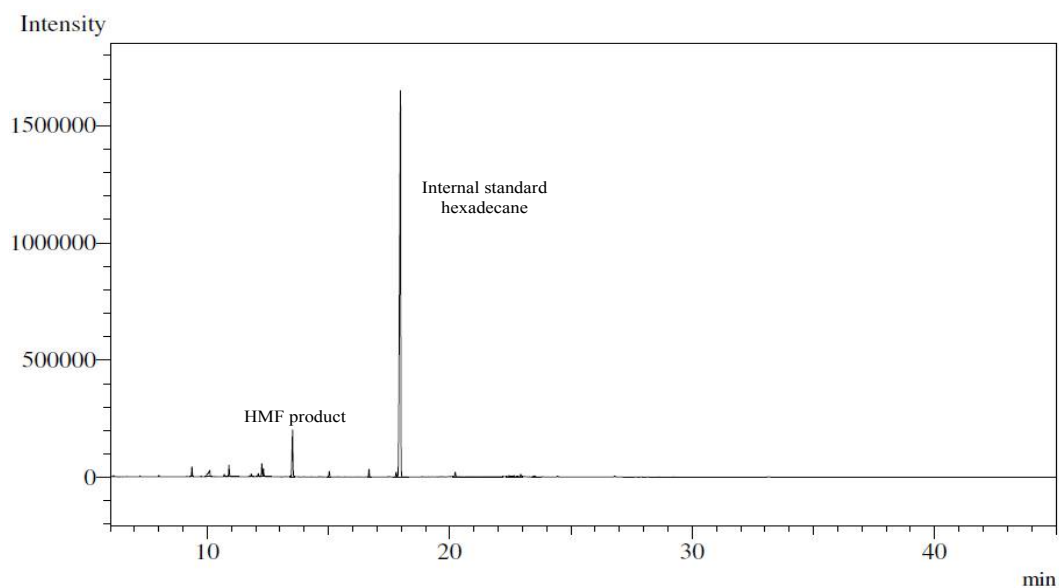

**Fig. S10** GC chromatogram of HMF obtained by conversion of glucose (Run 1; for Catalytic system recyclability)

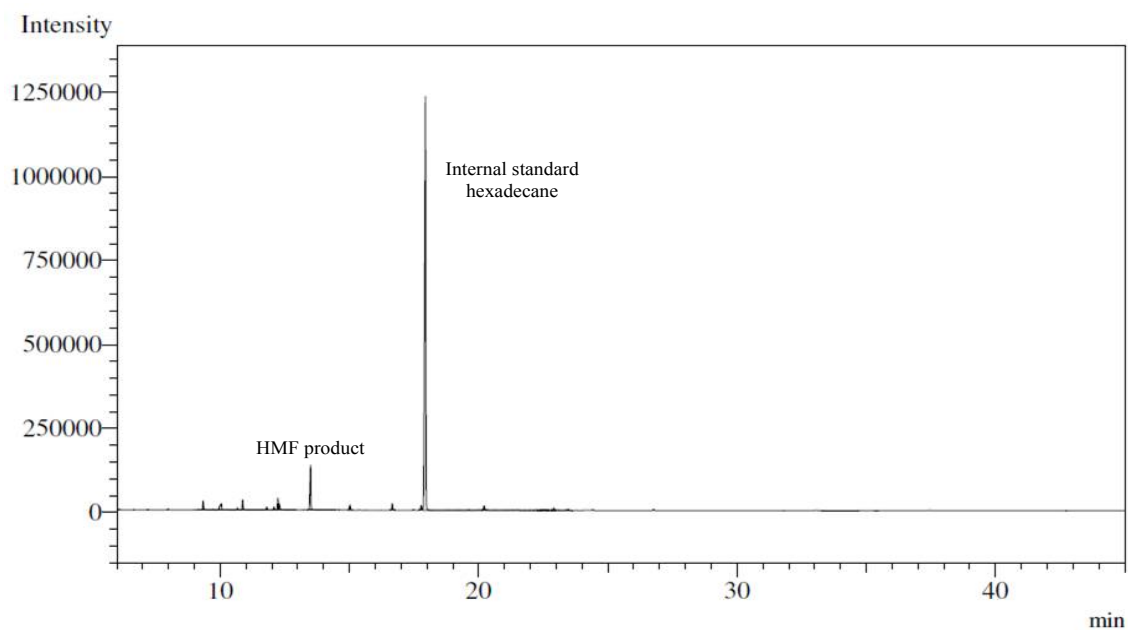

**Fig. S11** GC chromatogram of HMF obtained by conversion of glucose (Run 2; for Catalytic system recyclability)



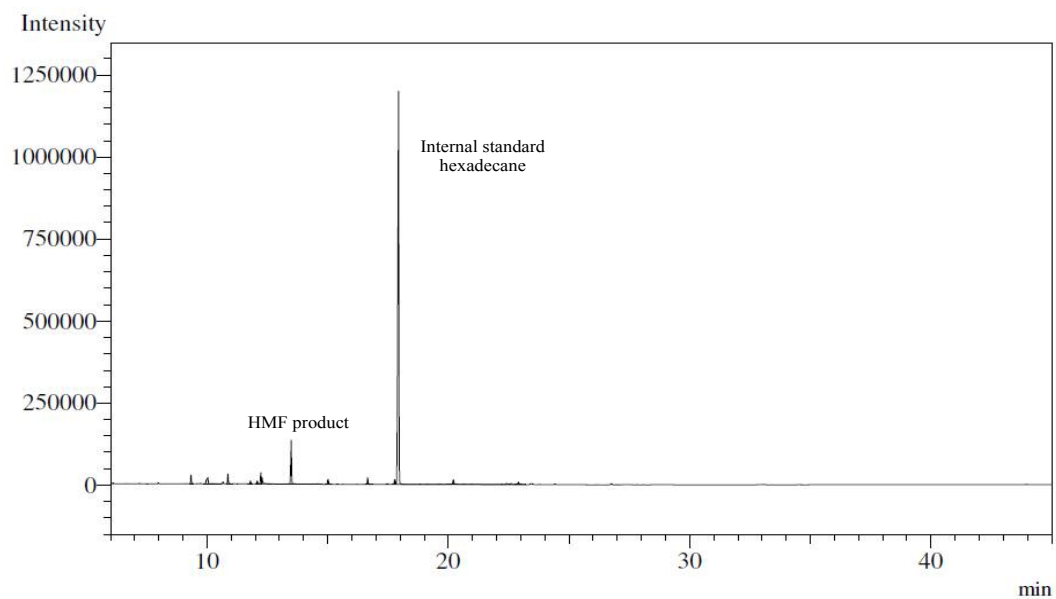

**Fig. S12** GC chromatogram of HMF obtained by conversion of glucose (Run 3; for Catalytic system recyclability)

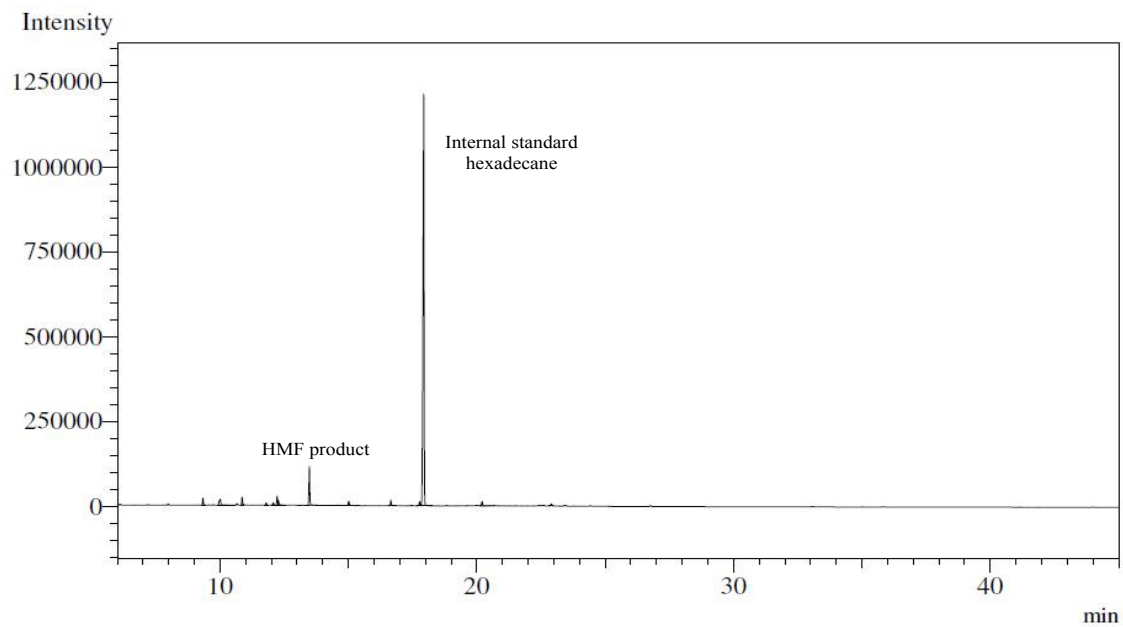

**Fig. S13** GC chromatogram of HMF obtained by conversion of glucose (Run 4; for Catalytic system recyclability)
